# Supplementary material for: Analysis of Clinical Profiles and Echocardiographic Cardiac Outcomes in Peripartum Cardiomyopathy (PPCM) vs. PPCM with Co-Existing Hypertensive Pregnancy Disorder (HPD-PPCM) Patients: A Systematic Review and Meta-Analysis
Source: MDPI journal article supplement (doi:10.3390/jcm12165303), 2023-08-15
Supplement: s1 [file s1]

**Supplementary File S1. Searching strategy**

#1 cardiomyopathie\* OR "heart failure" OR "peripartum cardiomyopathy\*" OR PPCM

#2 preeclampsia OR pre-eclampsia OR PE OR "edema-proteinuria-hypertension" OR EPH OR "gestational edema-proteinuria-hypertension" OR GEPH OR "proteinuria edema hypertension gestosis"

#3 "peripartum period" OR peripartum OR pregnanc\*

#4 echocardiography OR echocardiography outcome

#5 clinical outcome\* OR "patient outcome\*" OR "health outcome\*" OR prognosis
